# Supplementary material for: Transplantable human motor networks as a neuron-directed strategy for spinal cord injury
Source: PubMed Central journal article supplement — iScience. 2021 Jul 10;24(8):102827. doi: 10.1016/j.isci.2021.102827 (PMC8333163; doi:10.1016/j.isci.2021.102827), 2021-07-10
Supplement: mmc1.pdf [file mmc1.pdf]

**iScience, Volume 24**

**Supplemental information**

**Transplantable human motor  
networks as a neuron-directed  
strategy for spinal cord injury**

**Zachary T. Olmsted, Cinzia Stigliano, Annalisa Scimemi, Tatiana Wolfe, Jose Cibelli, Philip J. Horner, and Janet L. Paluh**

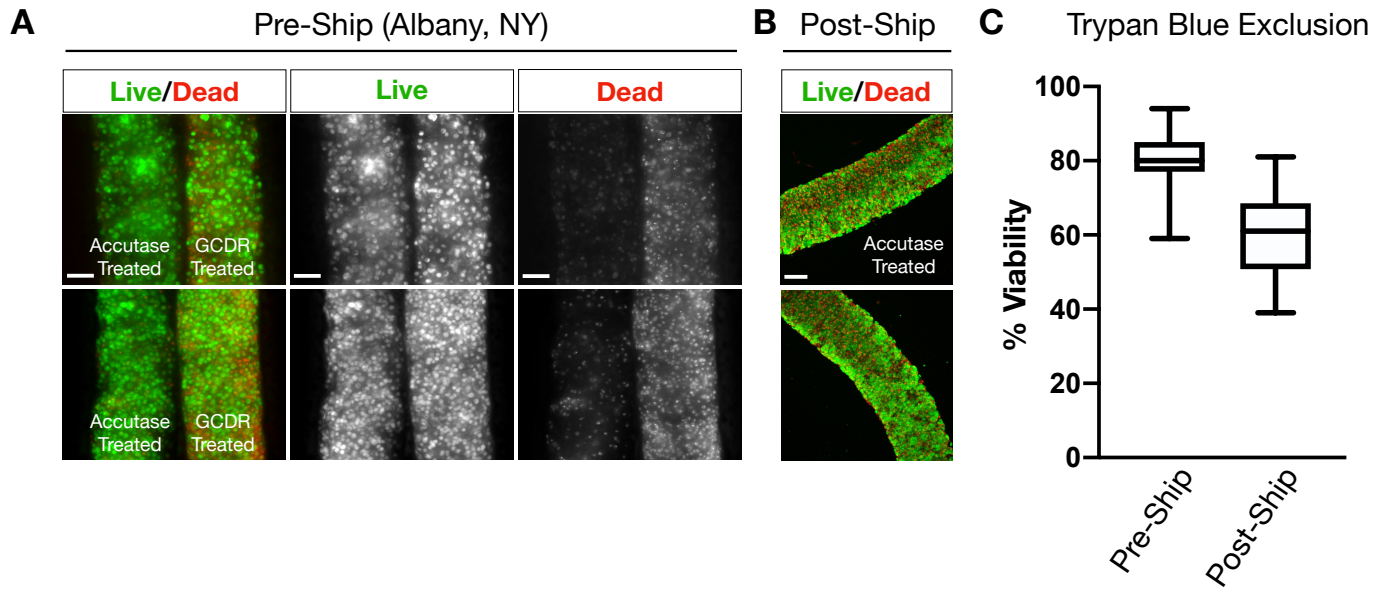

**Figure S1. Encapsulated neural cell viability before and after long-distance shipping, related to Figure 7. A,** Post-encapsulation Live/Dead stain of two neural ribbons manually placed to be adjacent prior to shipping on ice (Albany, NY). The leftmost neural ribbon was generated by encapsulating cells lifted using the 1:1 diluted Accutase method, and the rightmost neural ribbon was generated by encapsulating cells lifted using the Gentle Cell Dissociation Reagent (GCDR) method. Two fields are shown. Given the higher viability, we used Accutase at this stage for the *in vivo* studies and viability. **B,** Live/Dead stain of encapsulated neural cells after shipping on ice (Houston, TX). Two fields are shown. **C,** Trypan Blue exclusion assay of neural cells collected from neural ribbons pre- and post-shipment. Scale bars are 50 microns.

## Supplemental Tables

**Table S1. Biomarker Significance for This Study Related to STAR Methods**

| Target                                      | Significance                                                                          |
|---------------------------------------------|---------------------------------------------------------------------------------------|
| SOX2                                        | Pluripotency, neuromesodermal progenitors (with Bra), neuroectoderm (without Bra)     |
| Brachyury (Bra)                             | Neuromesodermal progenitors (with SOX2)                                               |
| CDX2                                        | Hox gene collinear inducer in spinal cord, neuromesodermal progenitors, neuroectoderm |
| Nestin                                      | Neural stem cell intermediate filaments                                               |
| NCAM1                                       | Neural cell adhesion                                                                  |
| PAX6                                        | Neuroectoderm                                                                         |
| TUJ1 ( $\beta$ -III-tubulin, <i>TUBB3</i> ) | Neuron-specific $\beta$ -tubulin isotype                                              |
| MAP2                                        | Somatodendritic neuronal compartment                                                  |
| SMI312                                      | Pan-axonal antibody cocktail                                                          |
| Synapsin 1 ( <i>SYN</i> )                   | Pre-synaptic terminals                                                                |
| GAP-43                                      | Growth associated neuron protein                                                      |
| NKX6-1                                      | Motor neuron ventral progenitor domain (SMN, OPC lineages)                            |
| OLIG2                                       | Motor neuron ventral progenitor domain (SMN, OPC lineages)                            |
| ISL1                                        | Motor neuron progenitors, dl3 interneurons with TLX3                                  |
| HB9 ( <i>MNR2/MNX1</i> )                    | Motor neurons                                                                         |
| FOXP1                                       | Lateral motor column                                                                  |
| ChAT                                        | Cholinergic neurotransmission in motor neurons                                        |
| PSD-95                                      | Excitatory post-synaptic density                                                      |

|            |                                                                                        |
|------------|----------------------------------------------------------------------------------------|
| Peripherin | Peripheral neuron projection intermediate filaments (motor neurons)                    |
| NKX2-2     | OPC lineage, ventral spinal cord                                                       |
| O4         | OPC surface sulfatide                                                                  |
| CD44       | Astrocyte surface protein                                                              |
| GFAP       | Astrocyte intermediate filaments                                                       |
| CHX10      | V2a excitatory ventral spinal interneurons                                             |
| GATA3      | V2b inhibitory ventral spinal interneurons                                             |
| PAX2       | V0, V1 ventral spinal interneurons<br>dI4, dI6 dorsal-intermediate spinal interneurons |
| LBX1       | V0, V1 ventral spinal interneurons<br>dI4, dI6 dorsal-intermediate spinal interneurons |
| TLX3       | dI3 dorsal spinal interneurons with ISL1                                               |
| LHX9       | dI1 dorsal spinal interneurons                                                         |
| BRN3A      | Sensory neurons, dorsal spinal interneurons                                            |
| STEM121    | Anti-human cytoplasm (graft)                                                           |
| GFP        | GFP immunofluorescence detection in OPCs (in vitro)                                    |

**Table S2. Electrophysiology Current Clamp Samples Related to Figure 4**

| <b>Days in differentiation</b> | <b>Medium</b>     | <b>PLGA neurotrophic factor beads</b> | <b>Neural ribbon (Y/N)</b> | <b>Cells patched (n = )</b> | <b>Differentiations (N = )</b> |
|--------------------------------|-------------------|---------------------------------------|----------------------------|-----------------------------|--------------------------------|
| 33-35                          | CVPM <sup>a</sup> | None                                  | No                         | 10                          | 3                              |
| 32-34                          | TDM <sup>b</sup>  | 5 $\mu$ l/ml BDNF, GDNF               | No                         | 9                           | 3                              |
| 32-34                          | TDM               | 5 $\mu$ l/ml BDNF, GDNF               | Yes                        | 13                          | 3                              |
| 45-51                          | CVPM              | None                                  | No                         | 11                          | 3                              |
| 51-52                          | TDM               | 5 $\mu$ l/ml BDNF, GDNF               | No                         | 11                          | 4                              |
| 51-52                          | TDM               | 5 $\mu$ l/ml BDNF, GDNF               | Yes                        | 13                          | 3                              |

<sup>a</sup> Caudo-Ventral Patterning Medium (N2B27 + RA, Hh-Ag1.5)

<sup>b</sup> Terminal Differentiation Medium (N2B27 + BDNF, GDNF, dbcAMP)
